# Supplementary material for: The endoscopy safety checklist: A longitudinal study of factors affecting compliance in a tertiary referral centre within the United Kingdom
Source: PubMed Central journal article supplement — BMJ Qual Improv Rep. 2015 Feb 11;4(1):u206344.w2567. doi: 10.1136/bmjquality.u206344.w2567 (PMC4645827; doi:10.1136/bmjquality.u206344.w2567), 2015-02-11

**Title:** The endoscopy safety checklist: A longitudinal study of factors affecting compliance in a tertiary referral centre within the United Kingdom

**Submission:** BMJ Quality Improvement Report

**Figures and Tables**

Figure 1. Endoscopy team members' survey: 'Which pre-procedure checks are undertaken prior to each patient undergoing an endoscopic procedure?'

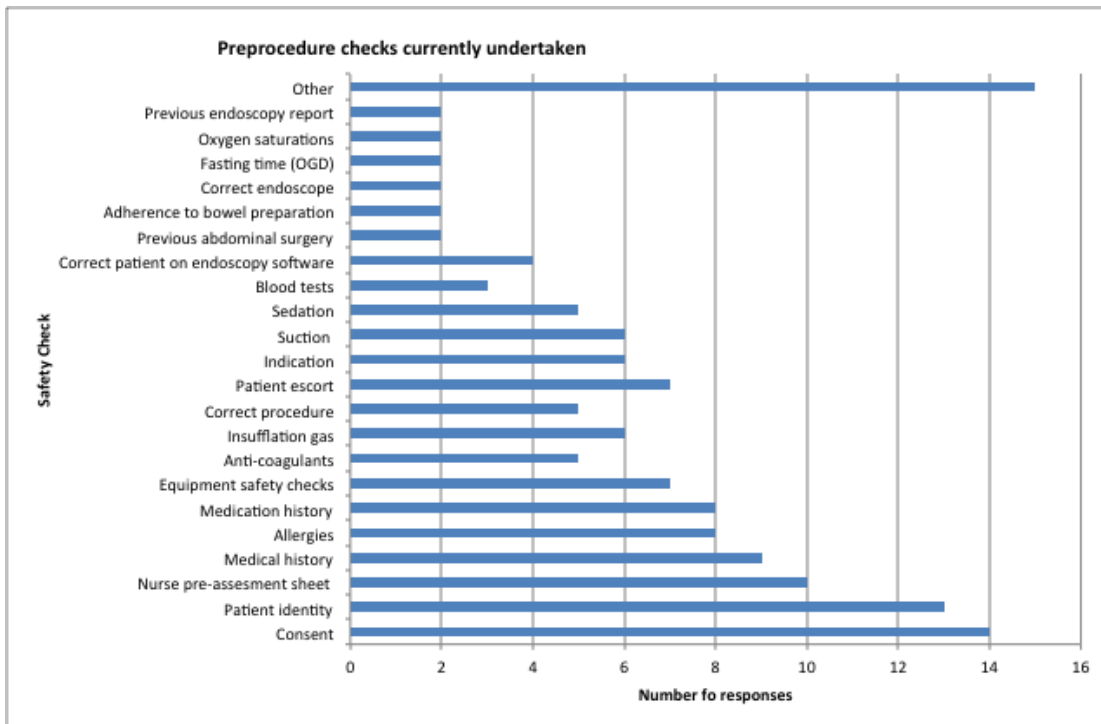

Figure 2. Comparison of checklist compliance pre- and post- intervention

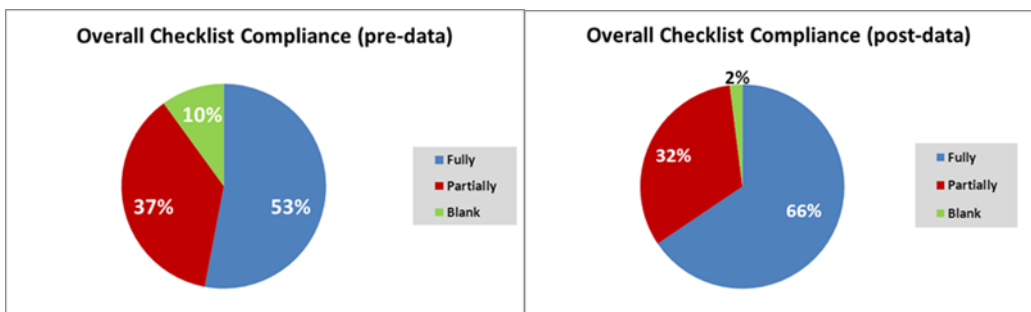

Table 1: Summary of factors affecting checklist compliance pre- and post- intervention.

| Factor                                | Pre-intervention                                        | Post-intervention                                                                       |
|---------------------------------------|---------------------------------------------------------|-----------------------------------------------------------------------------------------|
| Time of day                           | Greatest compliance in the morning (p<0.05)             | No difference in checklist compliance (am/ pm) (p=0.704)                                |
| Grade                                 | Greatest compliance by consultants and nurses (p<0.001) | Lowest compliance by consultants compared to -Nurses (0.021) -Registrars (p=0.0002)     |
| Patient sub-type (inpatient/elective) | Greatest compliance during bowel screening (p<0.01)     | In this dataset, only 2/151 were non-elective, therefore no comparisons have been drawn |

Figure 3. Comparison of the factors affecting checklist compliance pre- and post- intervention

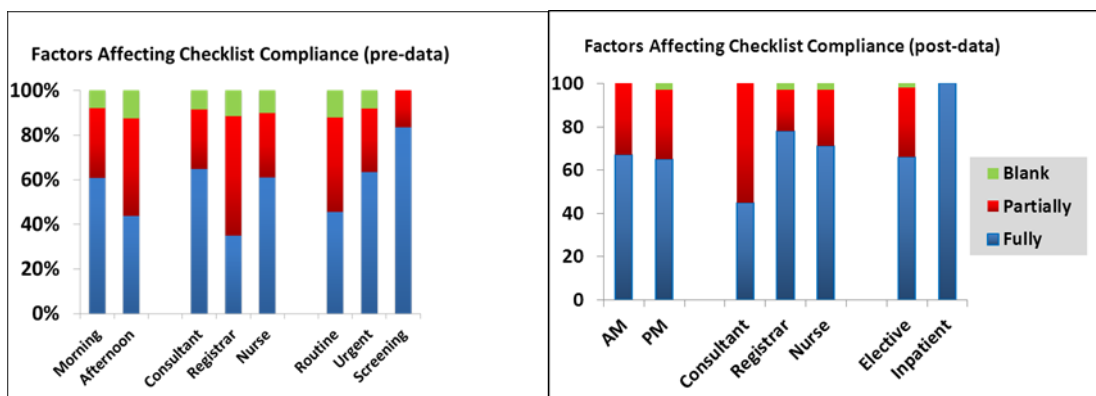

**Appendix 1**

Endoscopy Safety Checklist at The Wolfson Unit for Endoscopy, St. Mark's Hospital

|                                                                                                                                                                                                          |                                           |                                              |                                                               |
|----------------------------------------------------------------------------------------------------------------------------------------------------------------------------------------------------------|-------------------------------------------|----------------------------------------------|---------------------------------------------------------------|
| <br><br>Wolfson Unit<br>for Endoscopy | <b>ENDOSCOPY SAFETY CHECKLIST</b>         |                                              | <input checked="" type="checkbox"/><br>Affix patient ID label |
|                                                                                                                                                                                                          | <b>Time Out</b><br>Before scope insertion | Team introduction                            | <input type="checkbox"/> Yes                                  |
|                                                                                                                                                                                                          |                                           | Patient ID                                   | <input type="checkbox"/> Yes                                  |
|                                                                                                                                                                                                          |                                           | Correct screen on reporting software         | <input type="checkbox"/> Yes                                  |
|                                                                                                                                                                                                          |                                           | Correct procedure                            | <input type="checkbox"/> Yes                                  |
|                                                                                                                                                                                                          |                                           | Indication                                   | <input type="checkbox"/> Yes                                  |
|                                                                                                                                                                                                          |                                           | Consent                                      | <input type="checkbox"/> Yes                                  |
|                                                                                                                                                                                                          |                                           | Monitoring (IV access / O <sub>2</sub> sats) | <input type="checkbox"/> Yes                                  |
|                                                                                                                                                                                                          |                                           | Allergies                                    | <input type="checkbox"/> Yes <input type="checkbox"/> No      |
|                                                                                                                                                                                                          |                                           | Comorbidity                                  | <input type="checkbox"/> Yes <input type="checkbox"/> No      |
|                                                                                                                                                                                                          |                                           | Anticoagulants                               | <input type="checkbox"/> Yes <input type="checkbox"/> No      |
|                                                                                                                                                                                                          | Correct scope & kit                       | <input type="checkbox"/> Yes                 |                                                               |
|                                                                                                                                                                                                          | <b>Sign Out</b><br>End of procedure       | Samples & labelling                          | <input type="checkbox"/> Yes <input type="checkbox"/> N/A     |
| Accurate report                                                                                                                                                                                          |                                           | <input type="checkbox"/> Yes                 |                                                               |
| Follow-Up                                                                                                                                                                                                |                                           | <input type="checkbox"/> Yes                 |                                                               |
| Name (Dr / Nurse).....Date & Time.....Signature.....                                                                                                                                                     |                                           |                                              |                                                               |

Figure 1. Endoscopy team members' survey: 'Which pre-procedure checks are undertaken prior to each patient undergoing an endoscopic procedure?'

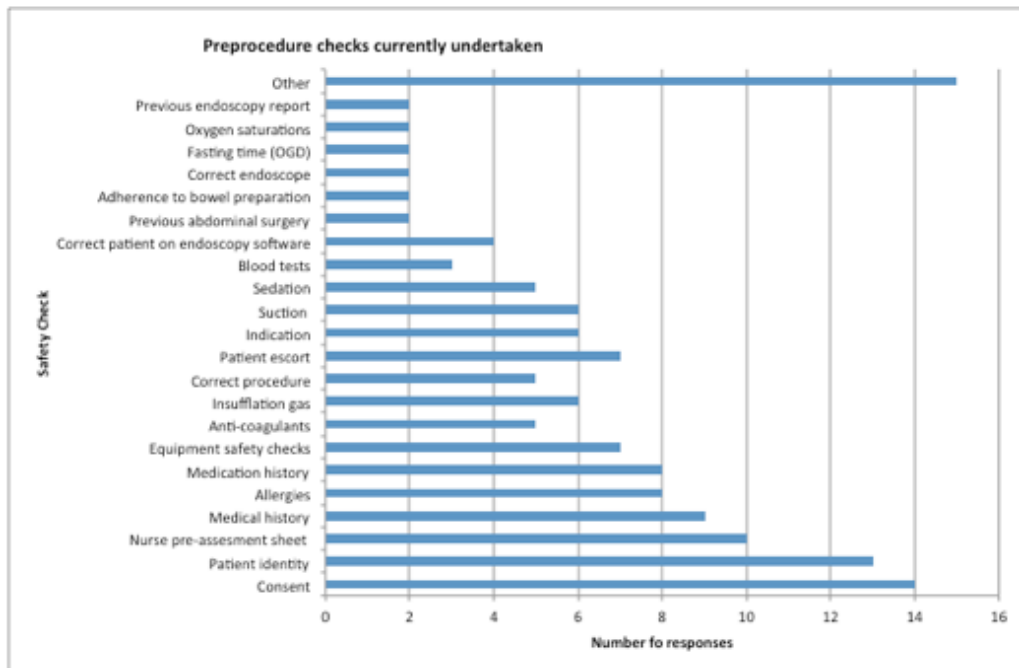

Supplement: bmjqir-4-u206344-w2567-s1.pdf [file bmjqir-4-u206344-w2567-s1.pdf]
